# Supplementary material for: Antidiabetic potential of two medicinal plants used in Gabonese folk medicine
Source: PubMed Central journal article supplement (PMC4763413; doi:10.1186/s12906-016-1052-x), 2016-02-22

## Additional file 1

HPTLC of extracts 10, 14 and 15 using DPPH derivatization reagent.

The DPPH test shows some very prominent antioxidant zones

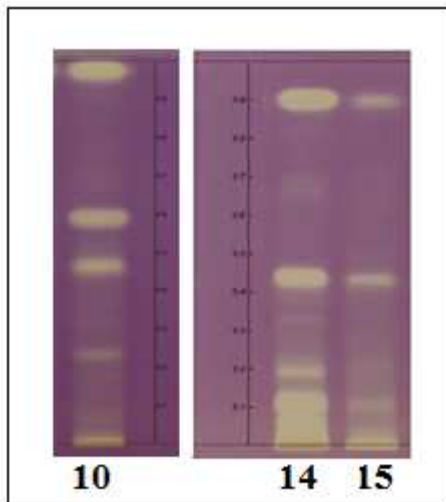

Supplement: 12906_2016_1052_MOESM1_ESM.pdf [file 12906_2016_1052_MOESM1_ESM.pdf]
