# Supplementary material for: Antidiabetic potential of two medicinal plants used in Gabonese folk medicine
Source: PubMed Central journal article supplement (PMC4763413; doi:10.1186/s12906-016-1052-x), 2016-02-22

## Additional file 2

Diagram showing inhibition of  $\alpha$ -glucosidase by extracts 14 and 15 at three concentrations.

$\alpha$ -Glucosidase was incubated with extracts at a concentration of 1, 0.1 and 0.01 mg/mL. Results are expressed as the percentage of activity of enzyme incubated with DMSO alone and are the mean  $\pm$  SE of three separate determinations. 10 mM Acarbose was used as specific inhibitor of  $\alpha$ -glucosidase.

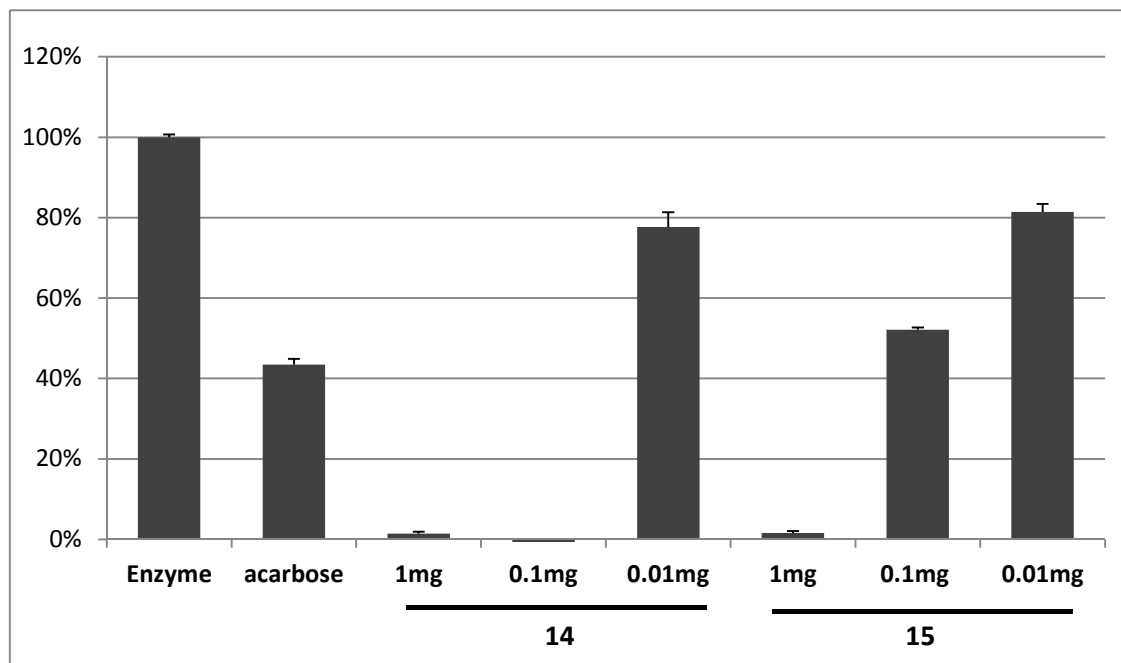

Supplement: 12906_2016_1052_MOESM2_ESM.pdf [file 12906_2016_1052_MOESM2_ESM.pdf]
