# Supplementary material for: Antidiabetic potential of two medicinal plants used in Gabonese folk medicine
Source: PubMed Central journal article supplement (PMC4763413; doi:10.1186/s12906-016-1052-x), 2016-02-22

**Additional file 4**

Preparative HPLC fractionation curve of the raw extract from *N. diderrichii* leaves (E14)

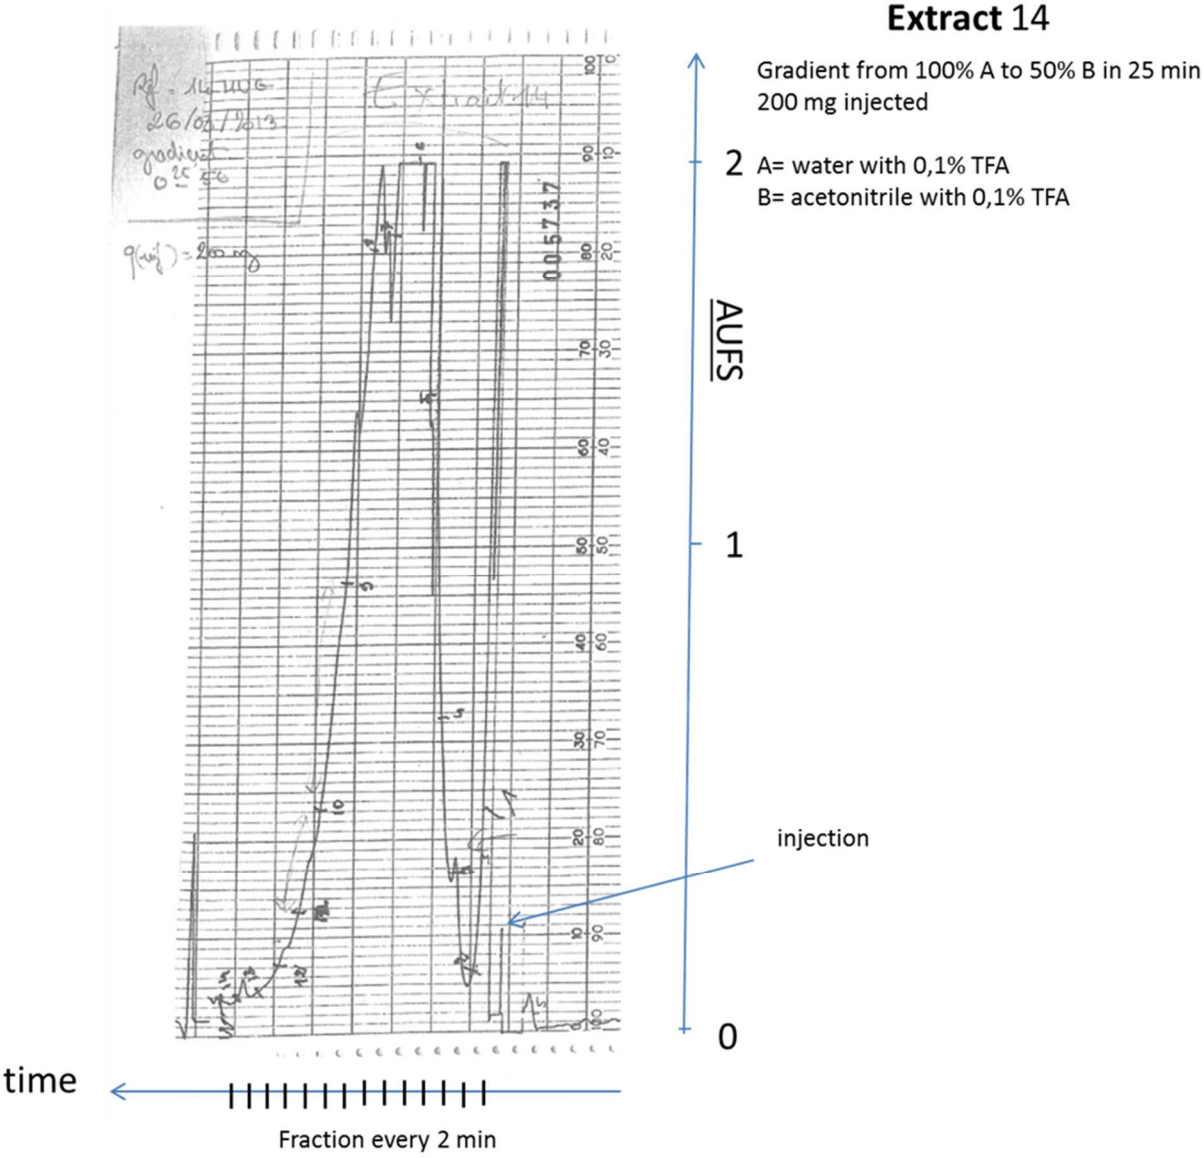

Supplement: 12906_2016_1052_MOESM4_ESM.pdf [file 12906_2016_1052_MOESM4_ESM.pdf]
